# Supplementary material for: DeepFake electrocardiograms: the key for open science for artificial intelligence in medicine
Source: bioRxiv or medRxiv preprint supplement (doi:10.1101/2021.04.27.21256189), 2021-05-10
Supplement: Supplementary file [file media-1.pdf]

# **DeepFake electrocardiograms: the beginning of the end for privacy issues in medicine**

Vajira Thambawita<sup>1,2,+</sup>, Jonas L. Isaksen<sup>3,+</sup>, Steven A. Hicks<sup>1,2</sup>, Jonas Ghouse<sup>3</sup>, GustavAhlberg<sup>3</sup>, Allan Linneberg<sup>3,4</sup>, Niels Grarup<sup>3</sup>, Christina Ellervik<sup>3</sup>, Morten Salling Olesen<sup>3</sup>, Torben Hansen<sup>3</sup>, Claus Graff<sup>5</sup>, Niels-Henrik Holstein-Rathlou<sup>6</sup>, Inga Strümke<sup>1</sup>, Hugo L. Hammer<sup>1,2</sup>, Molly Maleckar<sup>1,2</sup>, Pål Halvorsen<sup>1,2</sup>, Michael A. Riegler<sup>1+\*</sup>, and Jørgen K. Kanters<sup>3+\*</sup>

<sup>1</sup>SimulaMet, Oslo 0167, Norway

<sup>2</sup>Oslo Metropolitan University, Oslo 0167, Norway

<sup>3</sup>University of Copenhagen, DK2200 Copenhagen N, Denmark

<sup>4</sup>Bispebjerg and Frederiksberg Hospital, DK2400 Copenhagen NV, Denmark

<sup>5</sup>Aalborg University, Aalborg, Denmark

<sup>6</sup>Novo-Nordisk Foundation, Copenhagen, Denmark

Corresponding Authors [\\*jkanTERS@sund.ku.dk](mailto:*jkanTERS@sund.ku.dk) and [michael@simula.no](mailto:michael@simula.no)

+these authors contributed equally to this work

## Supplementary materials

**Table S1.** Full details of the WaveGAN\* Generator network.  $z$  = input noise vector, model dimension ( $d$ ) = 50, batch size ( $n$ ) = 32, channels ( $c$ ) = 8.

| Operation                            | Kernel       | Size               |
|--------------------------------------|--------------|--------------------|
| Input $z$                            |              | ( $n, 100$ )       |
| Dense 1                              | (100,10d)    | ( $n, 10d$ )       |
| Reshape                              |              | ( $n, 5d, 2$ )     |
| ReLU                                 |              | ( $n, 5d, 2$ )     |
| Deconv_block_1 (stride=1,upsample=5) | (25,5d,5d)   | ( $n, 5d, 10$ )    |
| Deconv_block_2 (stride=1,upsample=5) | (25,5d,3d)   | ( $n, 3d, 50$ )    |
| Deconv_block_3 (stride=1,upsample=5) | (25,3d,d)    | ( $n, d, 250$ )    |
| Deconv_block_4 (stride=1,upsample=2) | (25,d,d/2)   | ( $n, d/2, 500$ )  |
| Deconv_block_5 (stride=1,upsample=5) | (25,d/2,d/5) | ( $n, d/5, 2500$ ) |
| Deconv_block_6 (stride=1,upsample=2) | (25,d/5,c)   | ( $n, c, 5000$ )   |

**Table S2.** Full details of the Generator network of Pulse2Pulse.  $z$  = noise vector (pseudo ECG), model dimension ( $d$ ) = 50, batch size ( $n$ ) = 32, channels ( $c$ ) = 8. Deconvolution layers with \* mark take output features from the 2<sup>nd</sup>, 3<sup>rd</sup>, 4<sup>th</sup>, and 5<sup>th</sup> convolutional layers and concatenate into channel dimension.

| Operation                             | Kernel           | Size               |
|---------------------------------------|------------------|--------------------|
| Input $z$                             |                  | ( $n, c, 5000$ )   |
| Conv1D (Stride=2)                     | (25,c,d/5)       | ( $n, d/5, 2500$ ) |
| LReLU ( $\alpha=0.01$ )               |                  | ( $n, d/5, 2500$ ) |
| Conv1D (Stride=5)                     | (25,d/5,d/2)     | ( $n, d/2, 500$ )  |
| LReLU ( $\alpha=0.01$ )               |                  | ( $n, d/2, 500$ )  |
| Conv1D (Stride=2)                     | (25,d/2,d)       | ( $n, d, 250$ )    |
| LReLU ( $\alpha=0.01$ )               |                  | ( $n, d, 250$ )    |
| Conv1D (Stride=5)                     | (25,d,3d)        | ( $n, 3d, 50$ )    |
| LReLU ( $\alpha=0.01$ )               |                  | ( $n, 3d, 50$ )    |
| Conv1D (Stride=5)                     | (25,3d,5d)       | ( $n, 5d, 10$ )    |
| LReLU ( $\alpha=0.01$ )               |                  | ( $n, 5d, 10$ )    |
| Conv1D (Stride=5)                     | (25,5d,5d)       | ( $n, 5d, 2$ )     |
| LReLU ( $\alpha=0.01$ )               |                  | ( $n, 5d, 2$ )     |
| Deconv_block_1 (stride=1,upsample=5)  | (25,5d,5d)       | ( $n, 5d, 10$ )    |
| Deconv_block_2* (stride=1,upsample=5) | (25,5dx2,3d)     | ( $n, 3d, 50$ )    |
| Deconv_block_3* (stride=1,upsample=5) | (25,3dx2,d)      | ( $n, d, 250$ )    |
| Deconv_block_4* (stride=1,upsample=2) | (25,dx2,d/2)     | ( $n, d/2, 500$ )  |
| Deconv_block_5* (stride=1,upsample=5) | (25,(d/2)x2,d/5) | ( $n, d/5, 2500$ ) |
| Deconv_block_6 (stride=1,upsample=2)  | (25,d/5,c)       | ( $n, c, 5000$ )   |

**Table S3.** Details of the discriminator network. Model dimension ( $d$ ) = 50, channels ( $c$ ) = 8, batch size ( $n$ ) = 32.

| Operation               | Kernel Size<br>(width,channels,filters) | Output Shape    |
|-------------------------|-----------------------------------------|-----------------|
| Input $x$ or $G(z)$     |                                         | ( $n,c,5000$ )  |
| Conv1D (Stride=2)       | (25, $c,d$ )                            | ( $n,d,2499$ )  |
| LReLU ( $\alpha=0.2$ )  |                                         | ( $n,d,2499$ )  |
| Phase Shuffle ( $n=2$ ) |                                         | ( $n,d,2499$ )  |
| Conv1D (Stride=2)       | (25, $d,2d$ )                           | ( $n,2d,1249$ ) |
| LReLU ( $\alpha=0.2$ )  |                                         | ( $n,2d,1249$ ) |
| Phase Shuffle ( $n=2$ ) |                                         | ( $n,2d,1249$ ) |
| Conv1D (Stride=2)       | (25,2 $d,5d$ )                          | ( $n,5d,624$ )  |
| LReLU ( $\alpha=0.2$ )  |                                         | ( $n,5d,624$ )  |
| Phase Shuffle ( $n=2$ ) |                                         | ( $n,5d,624$ )  |
| Conv1D (Stride=2)       | (25,5 $d,10d$ )                         | ( $n,10d,311$ ) |
| LReLU ( $\alpha=0.2$ )  |                                         | ( $n,10d,311$ ) |
| Phase Shuffle ( $n=2$ ) |                                         | ( $n,10d,311$ ) |
| Conv1D (Stride=2)       | (25,10 $d,20d$ )                        | ( $n,20d,78$ )  |
| LReLU ( $\alpha=0.2$ )  |                                         | ( $n,20d,78$ )  |
| Phase Shuffle ( $n=2$ ) |                                         | ( $n,20d,78$ )  |
| Conv1D (Stride=2)       | (25,20 $d,25d$ )                        | ( $n,25d,19$ )  |
| LReLU ( $\alpha=0.2$ )  |                                         | ( $n,25d,19$ )  |
| Phase Shuffle ( $n=2$ ) |                                         | ( $n,25d,19$ )  |
| Conv1D (Stride=2)       | (25,25 $d,100d$ )                       | ( $n,100d,5$ )  |
| LReLU ( $\alpha=0.2$ )  |                                         | ( $n,100d,5$ )  |
| Linear                  |                                         | ( $n,25000,1$ ) |

**Table S4.** MUSE 12SL diagnoses for the Non-Normal DeepFake ECGs. Note that an ECG may have several ECG diagnoses. The table shows only diagnoses with at least 250 occurrences.

| <b>Total number of Non-Normal DeepFake ECGs</b> | <b>28023</b> |
|-------------------------------------------------|--------------|
| Non-Specific ST abnormality                     | 7176         |
| Sinus Bradycardia                               | 2863         |
| Inferior Infarct                                | 2540         |
| Left Ventricular Hypertrophy                    | 1777         |
| Non-Specific intraventricular delay             | 1610         |
| Low Voltage QRS                                 | 1566         |
| Fusion complexes                                | 1244         |
| Anterior Infarct                                | 1238         |
| ACUTE MI/STEMI                                  | 1003         |
| Left Axis Deviation                             | 826          |
| Lateral Infarct                                 | 773          |
| Premature Ventricular complexes                 | 748          |
| Septal Infarct                                  | 745          |
| Undetermined Rhythm                             | 630          |
| Premature Atrial Complexes                      | 615          |
| With short PR                                   | 614          |
| With 1 degree AV block                          | 584          |
| Non-specific T wave abnormality                 | 526          |
| Prolonged QT                                    | 460          |
| Non-specific interventricular block             | 444          |
| ST elevation (inferior injury)                  | 405          |
| Rightward axis                                  | 389          |
| Aberrant conduction                             | 384          |
| Left Ventricular Hypertrophy                    | 318          |
| Moderate Left Ventricular Hypertrophy           | 310          |
| Incomplete Right Bundle Branch Block            | 289          |
| Left atrial enlargement                         | 268          |

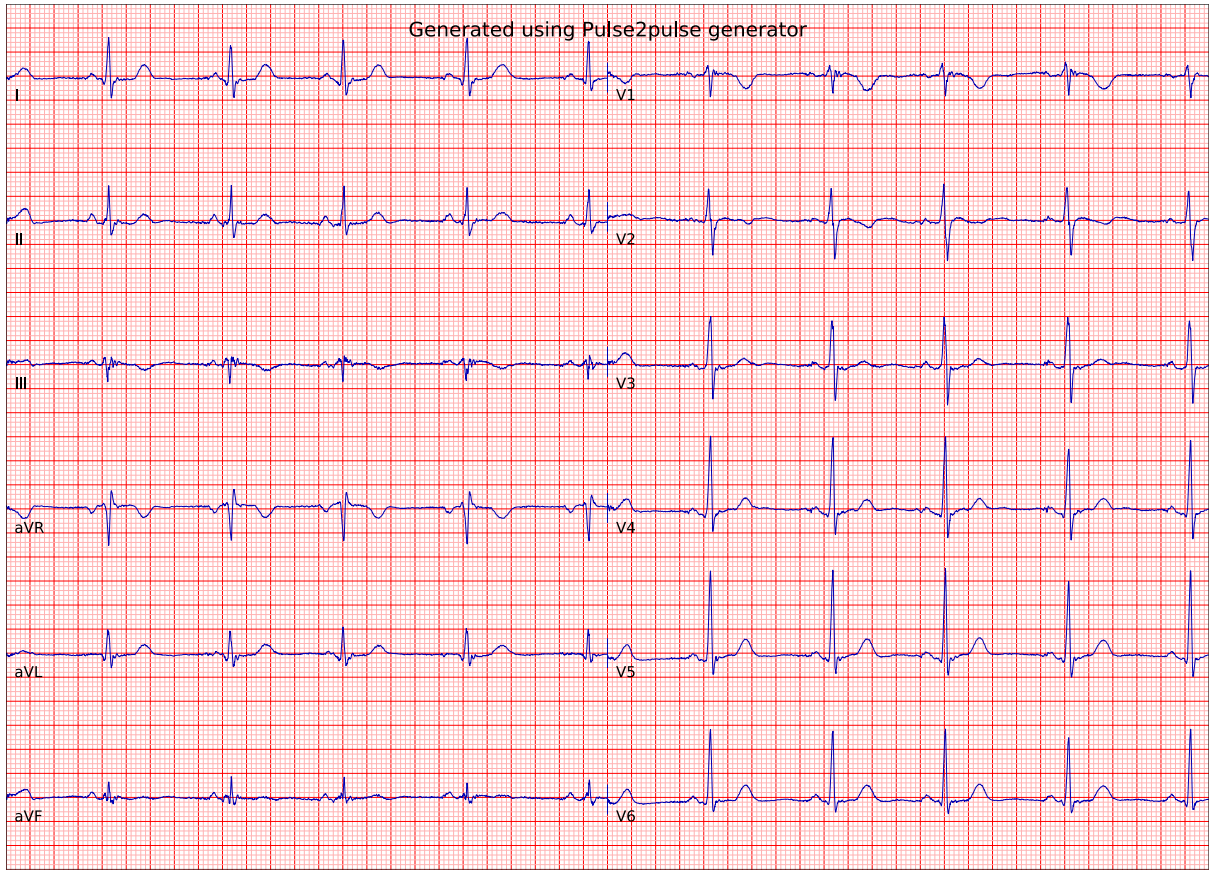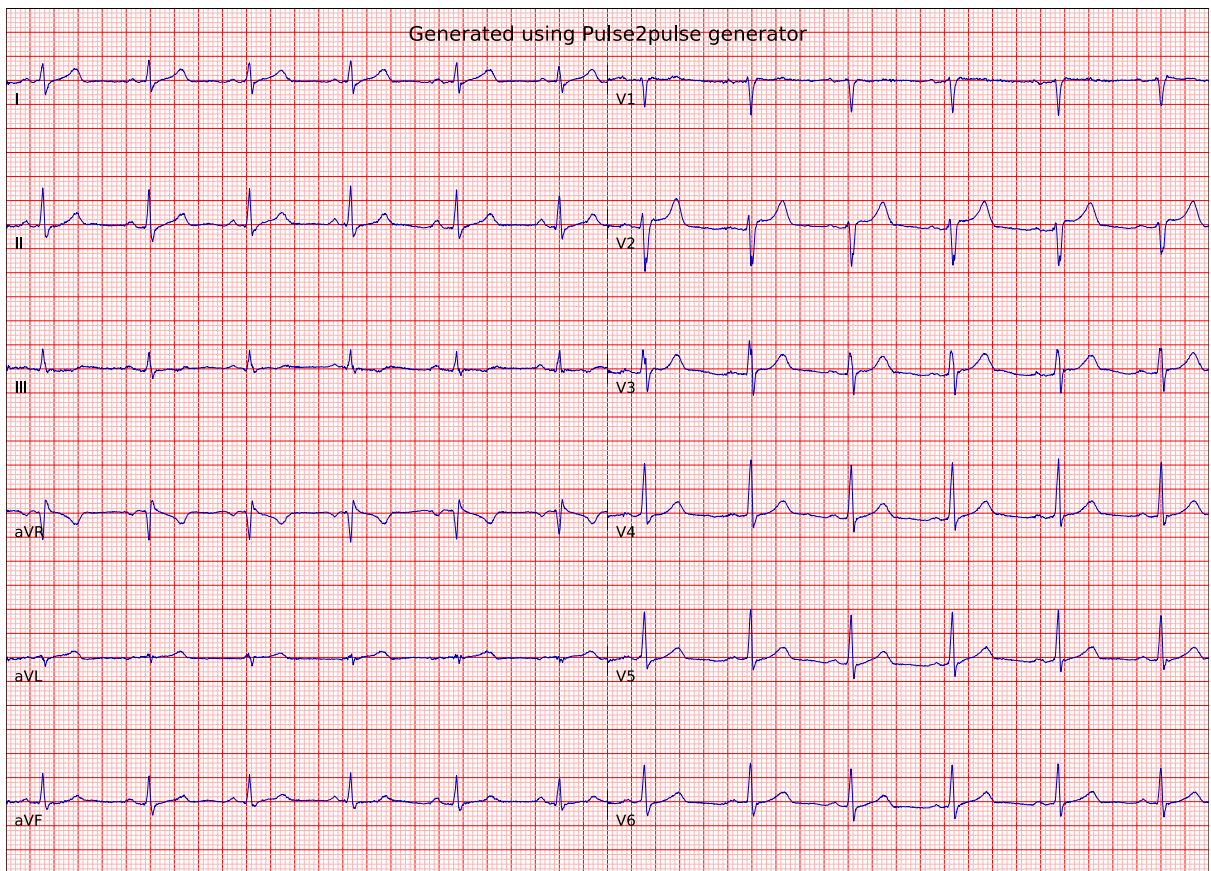

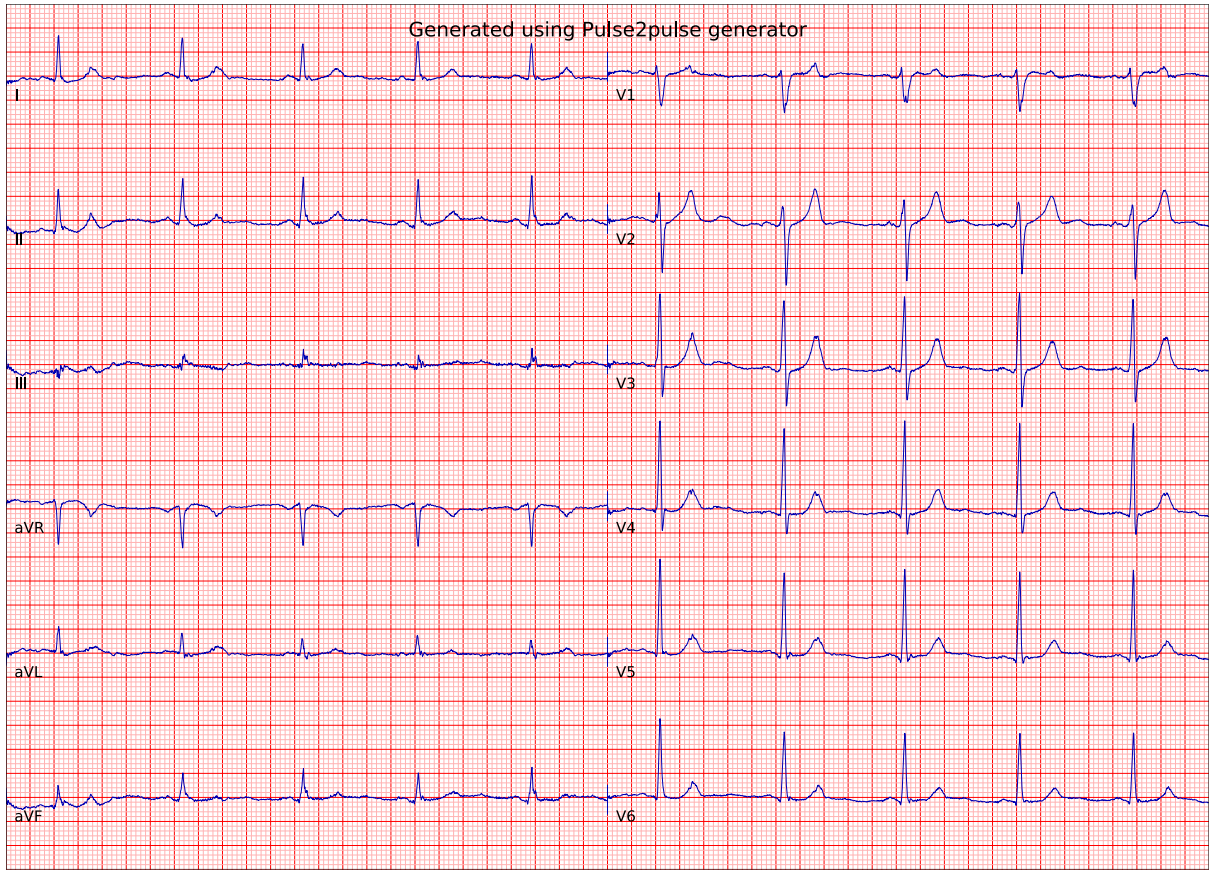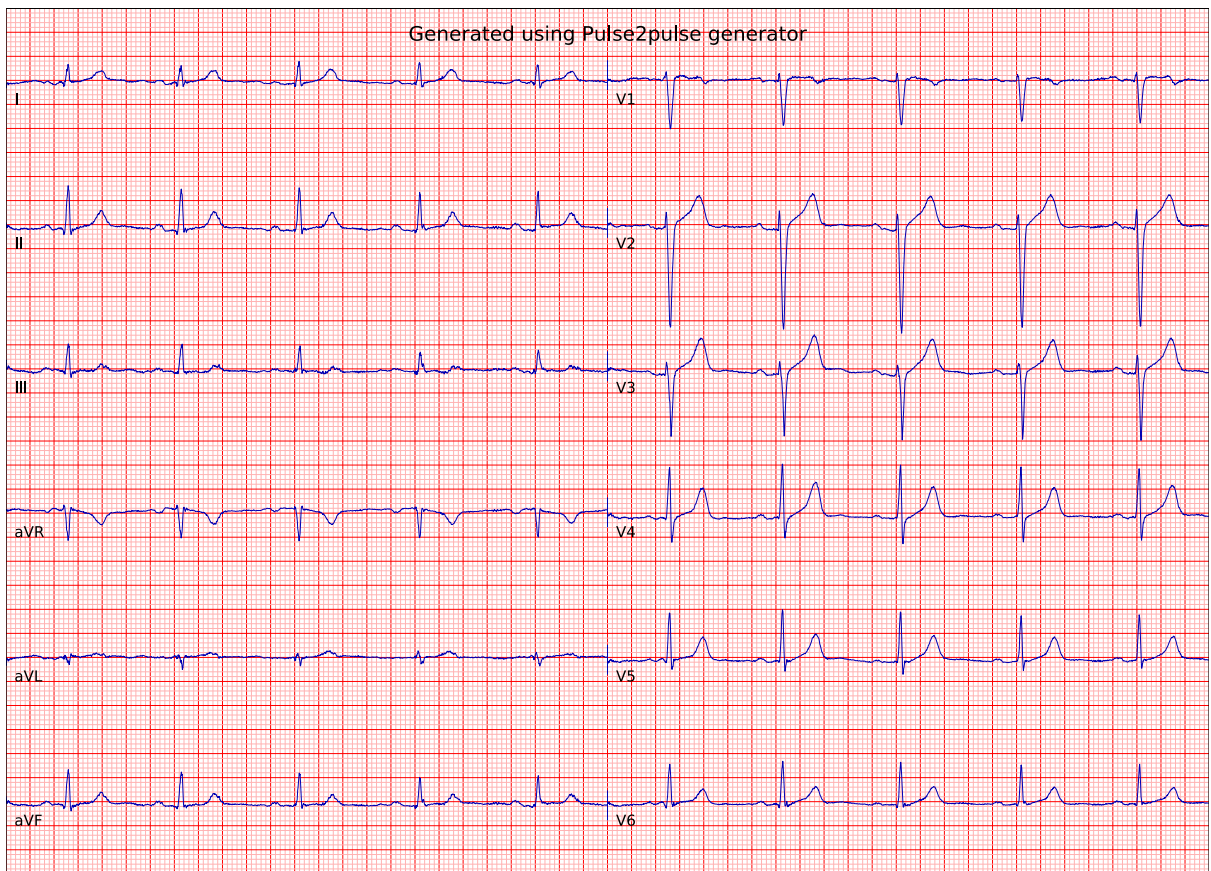



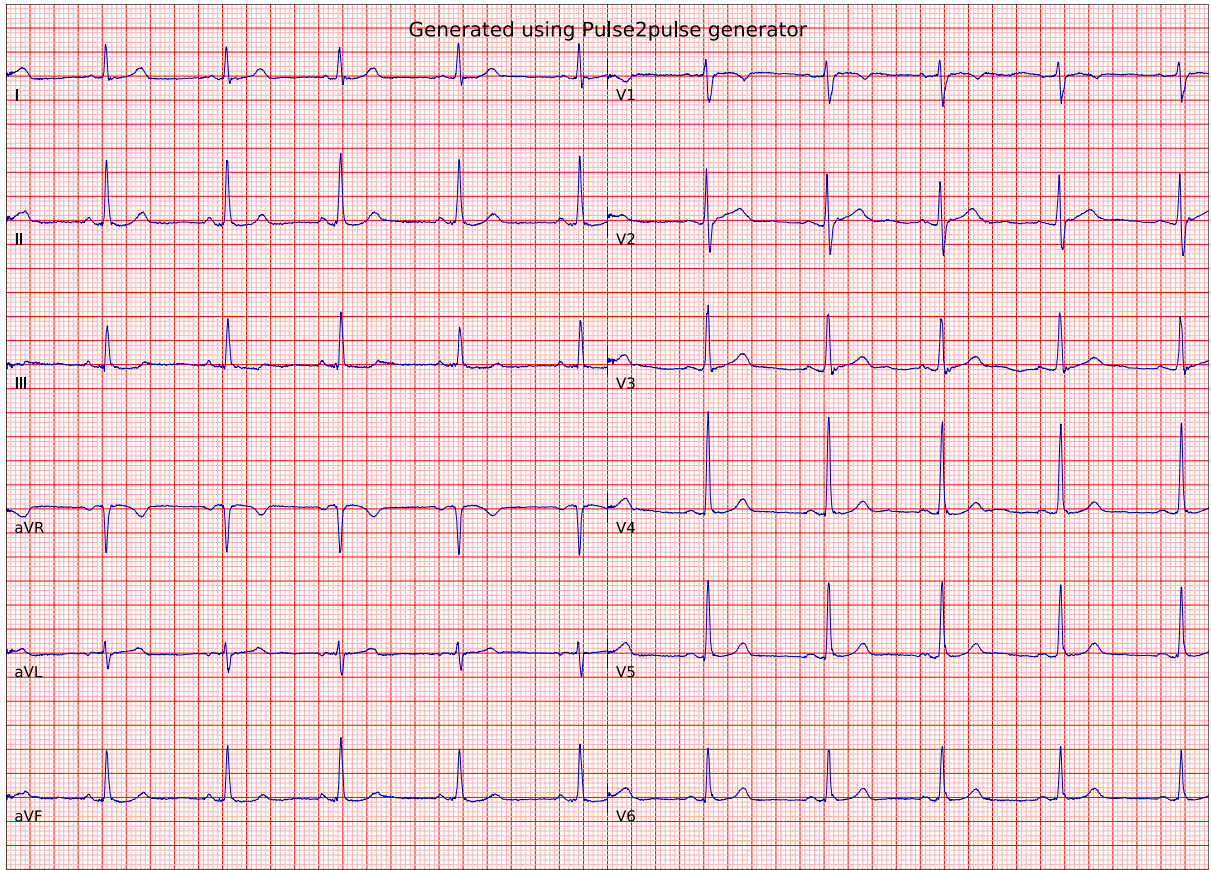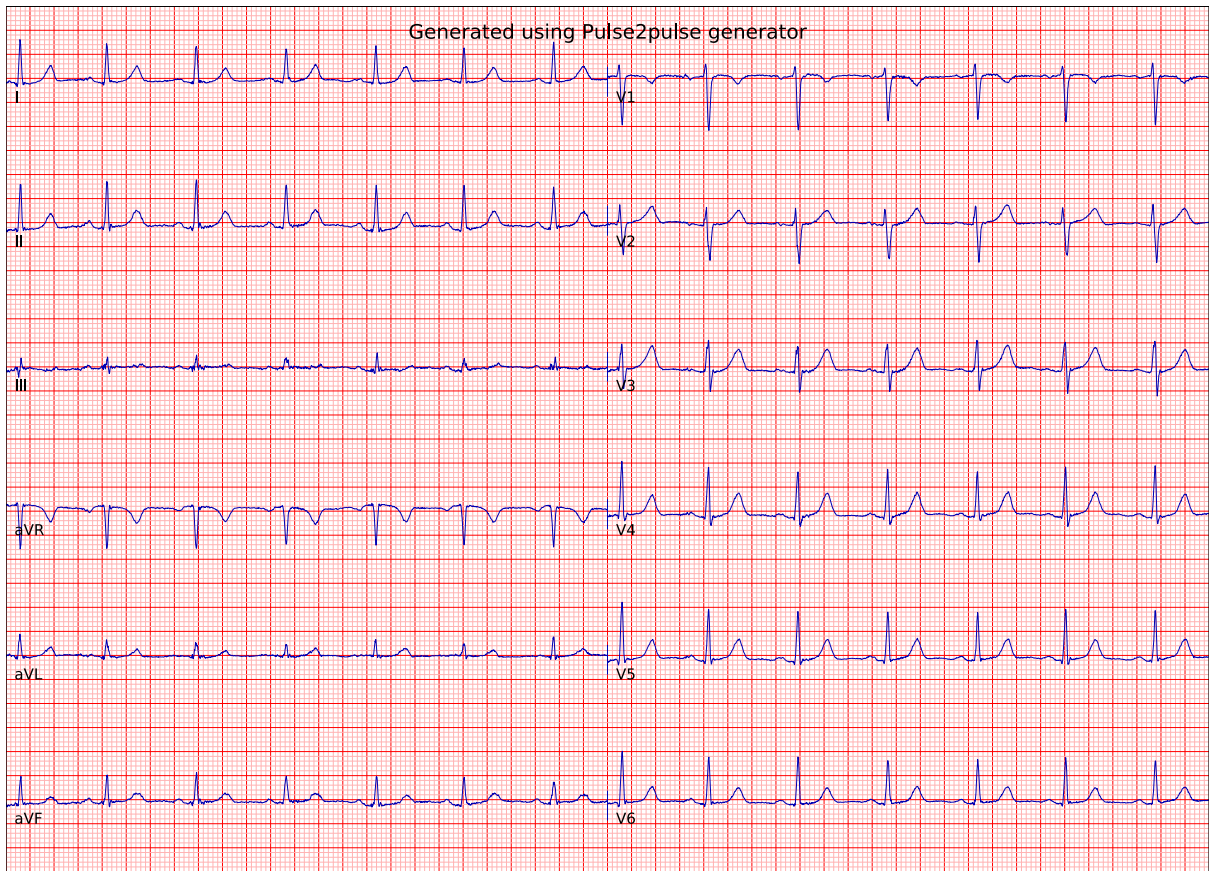

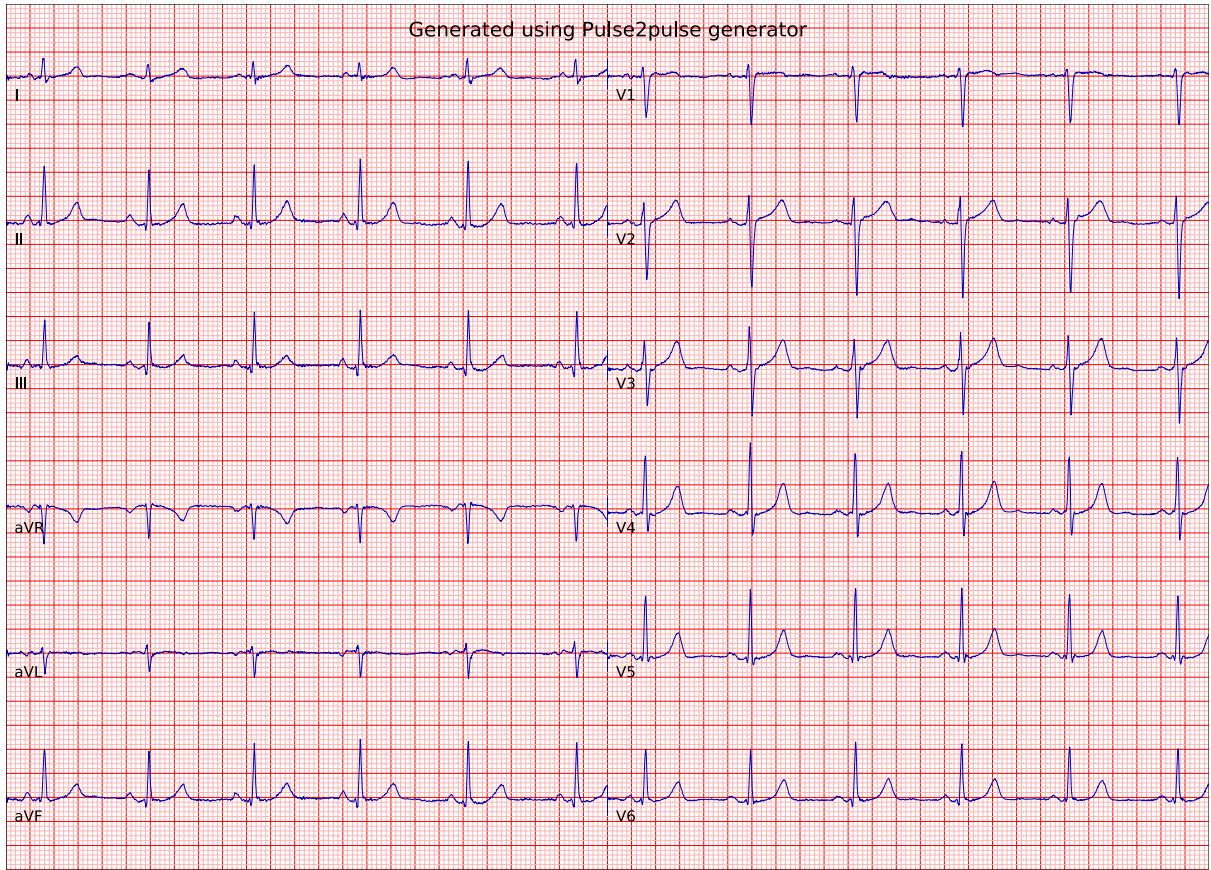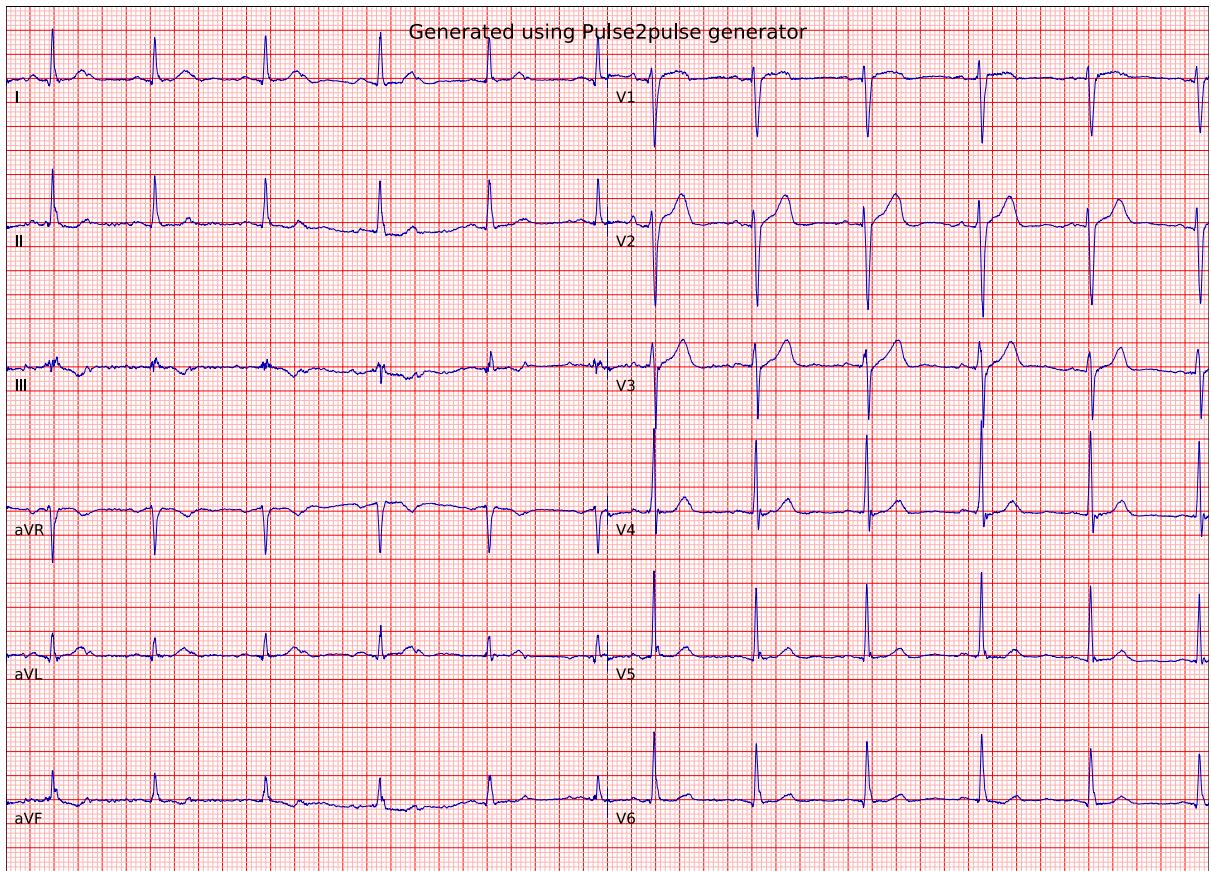



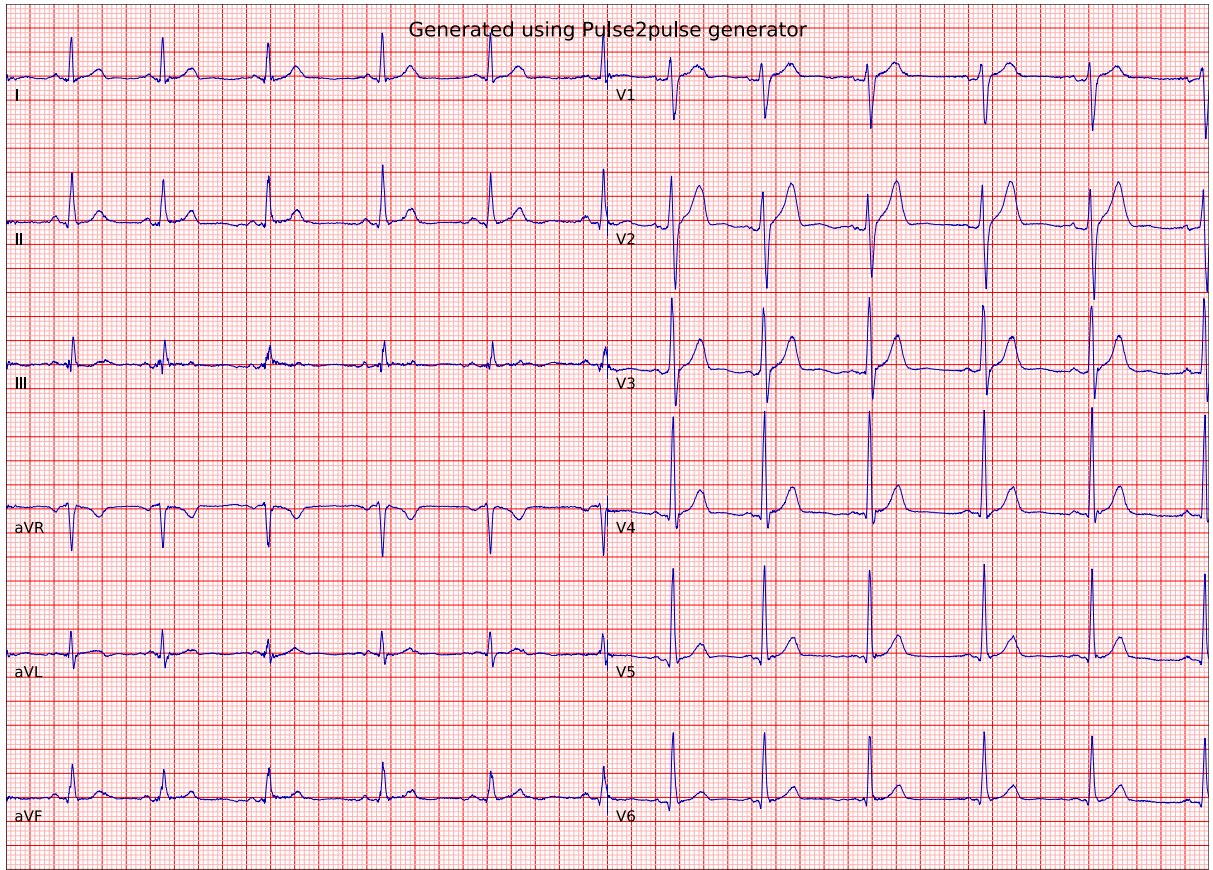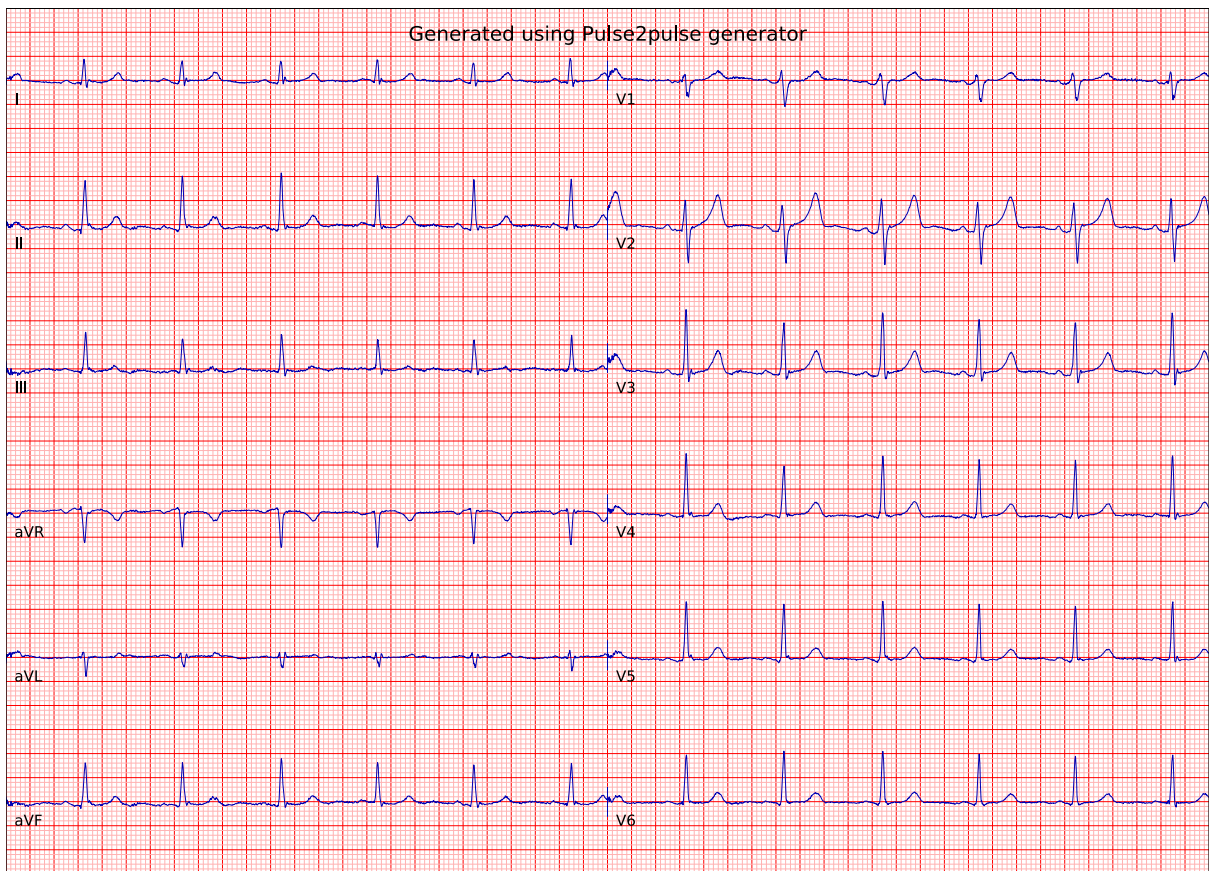

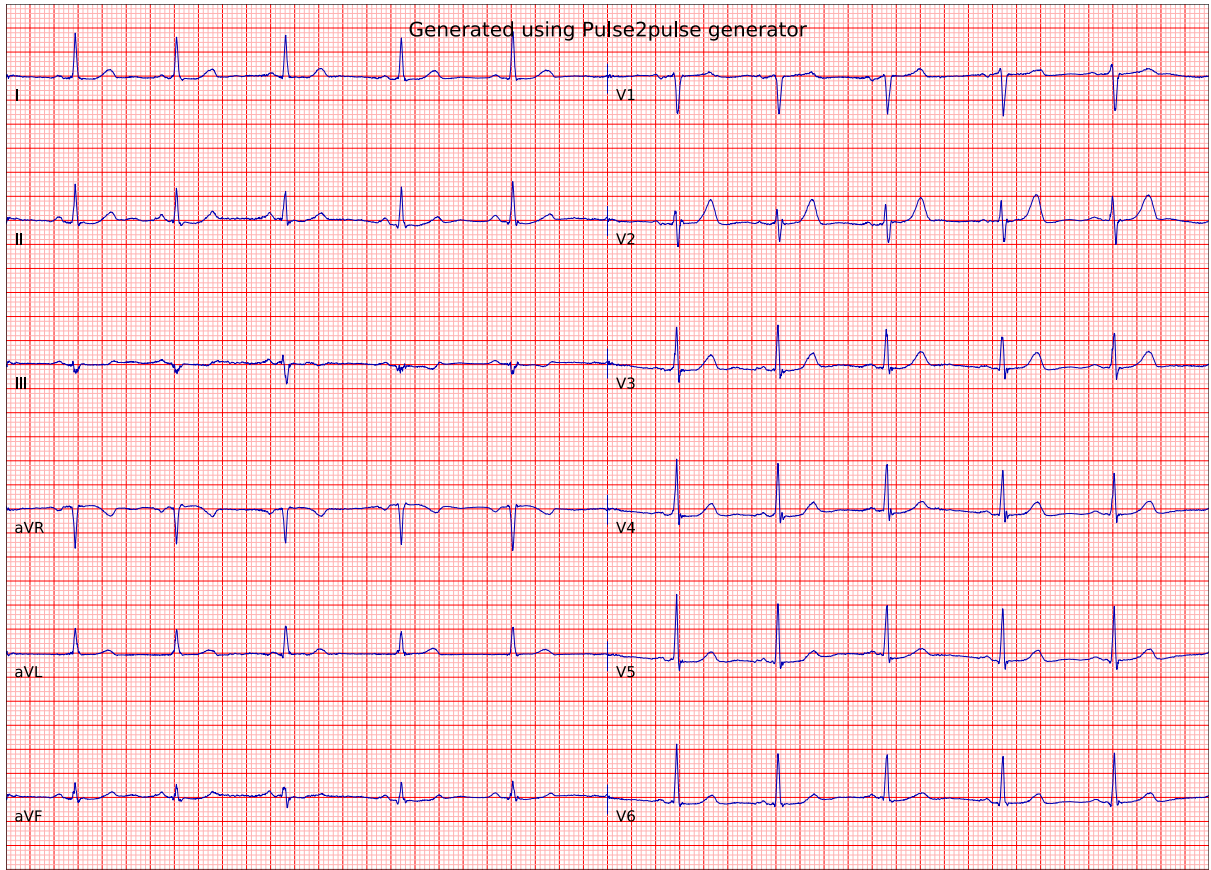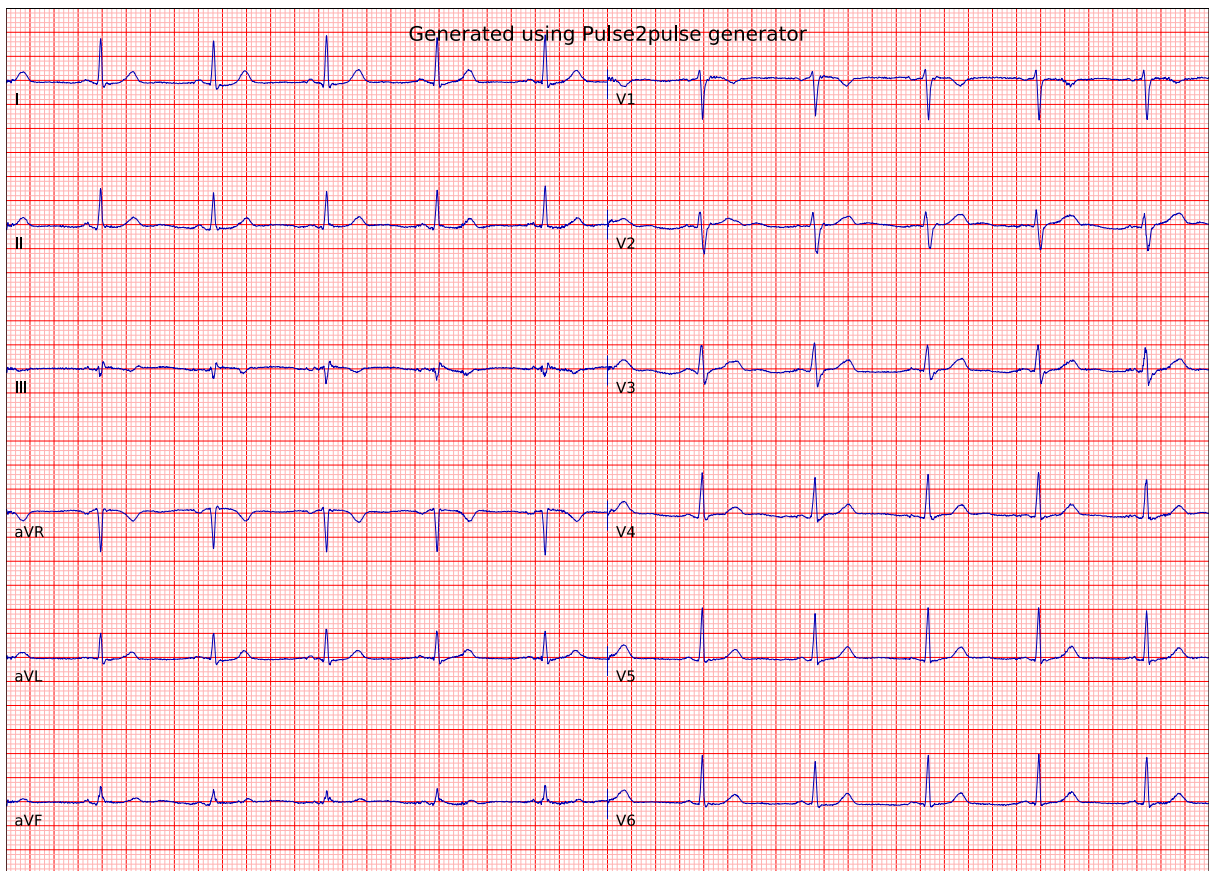

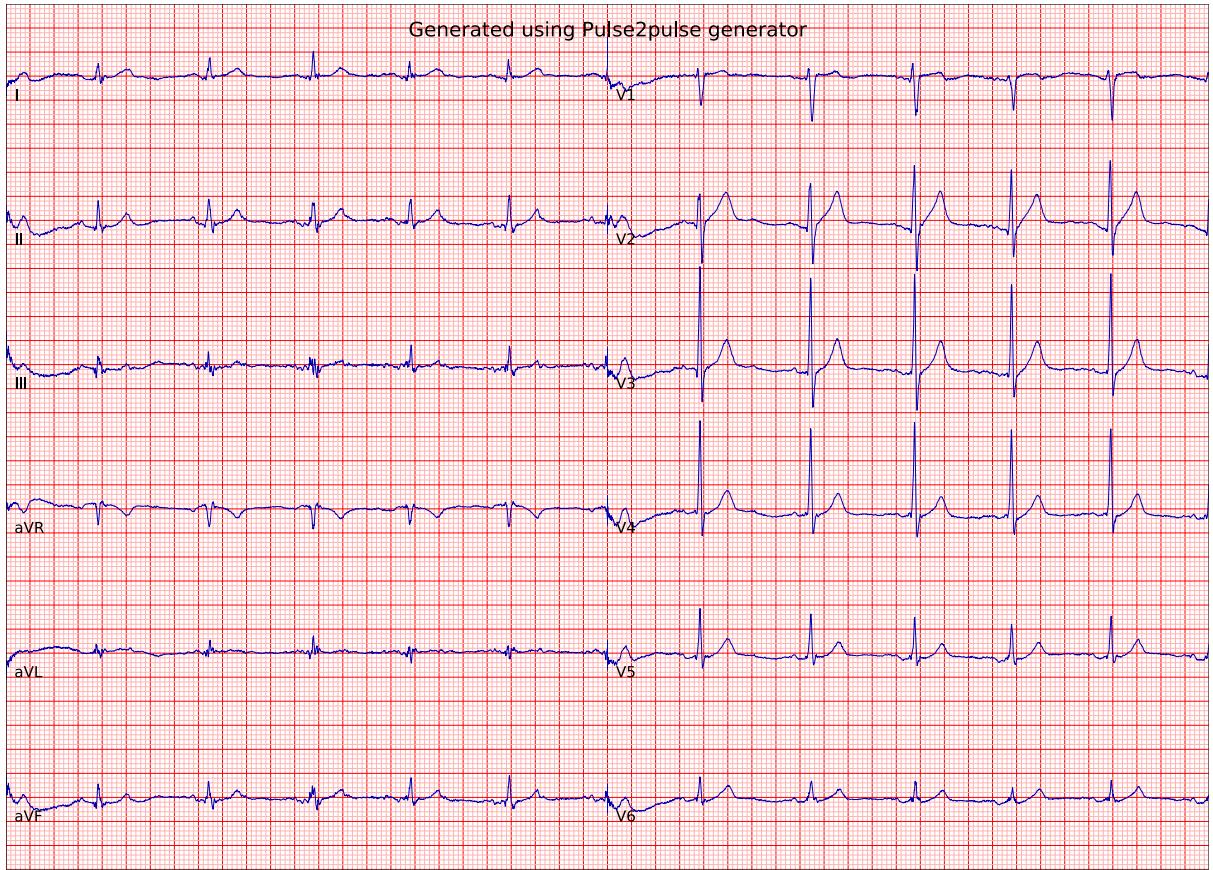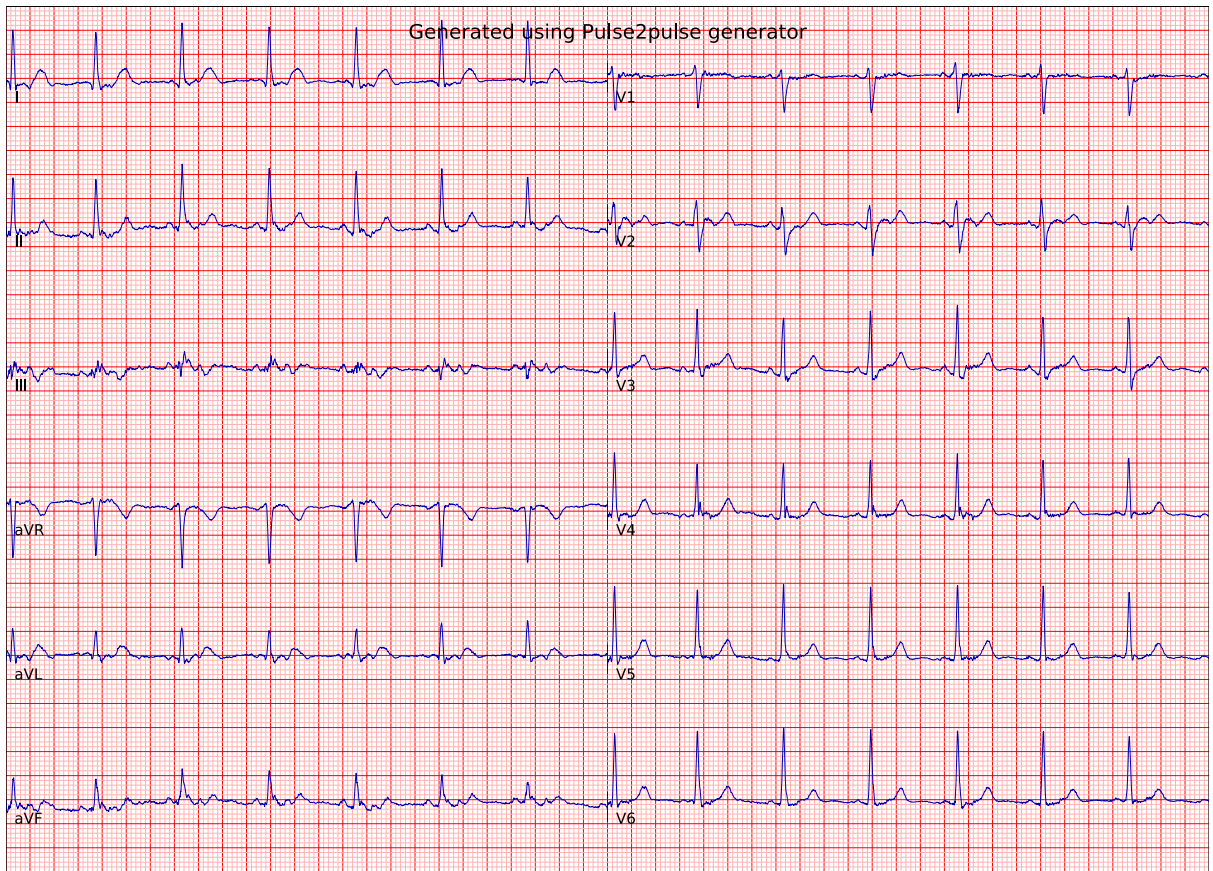



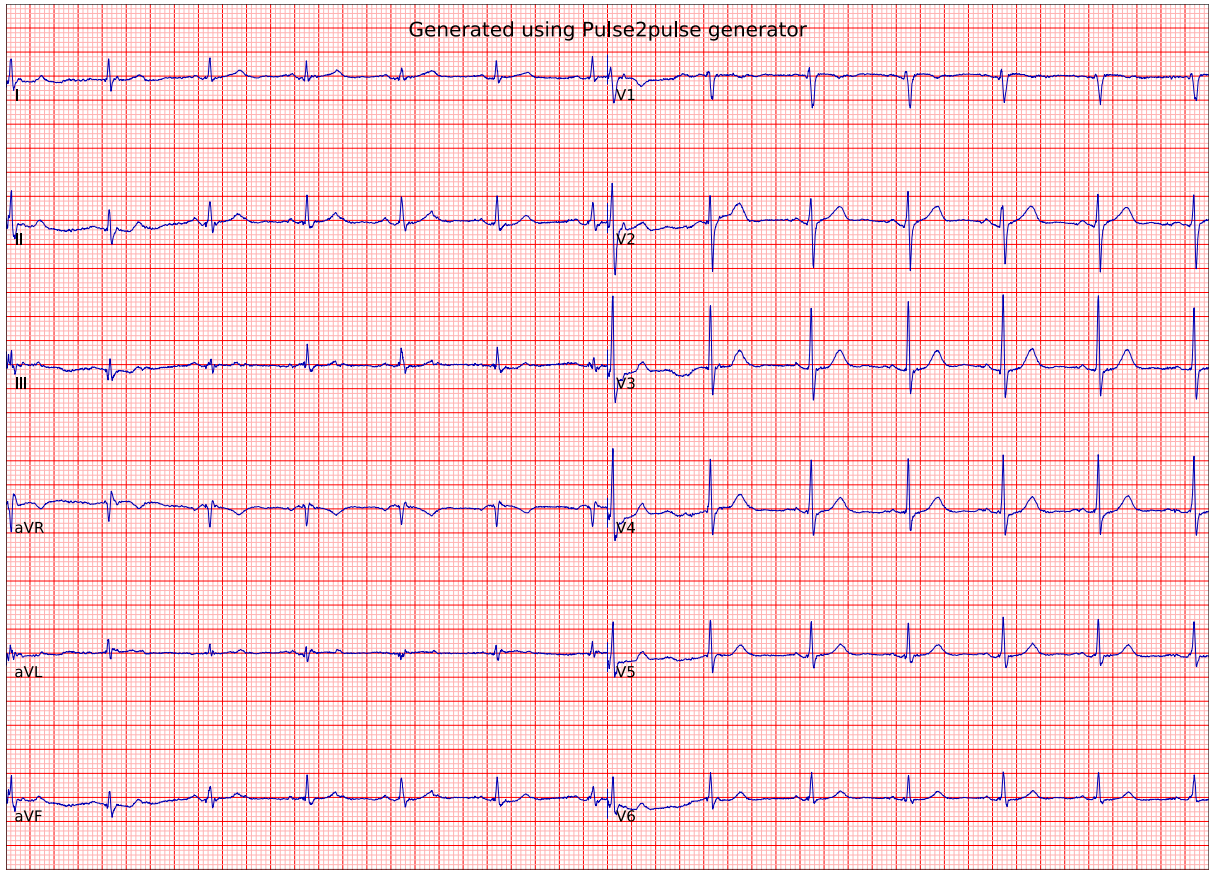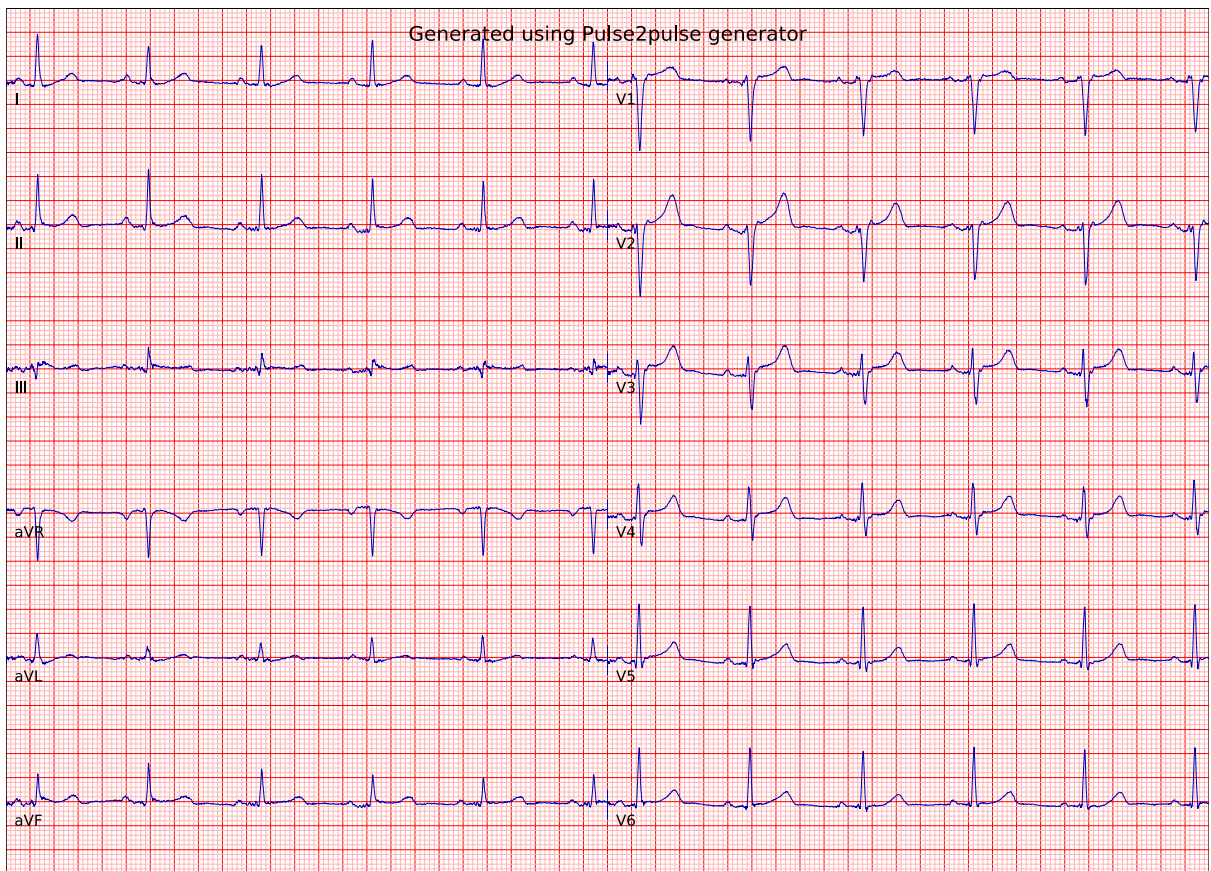

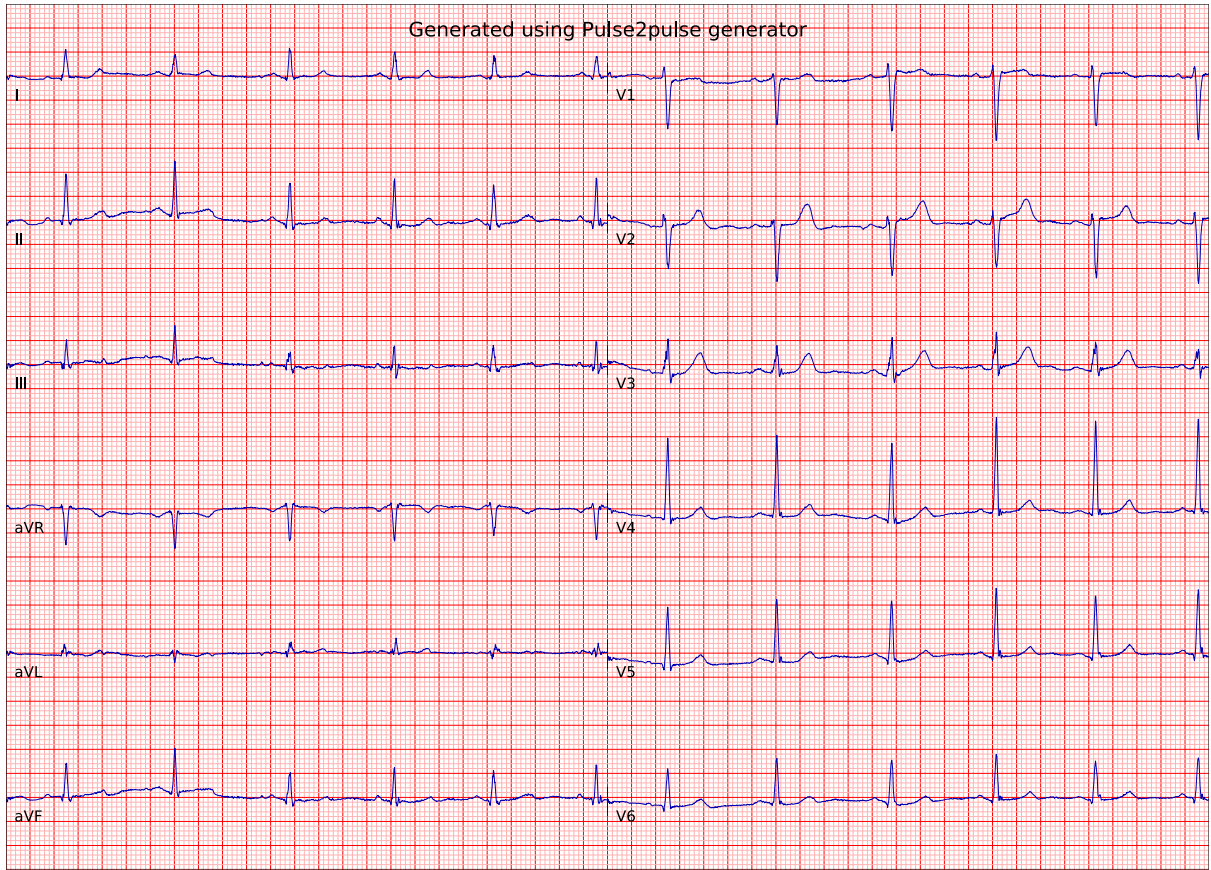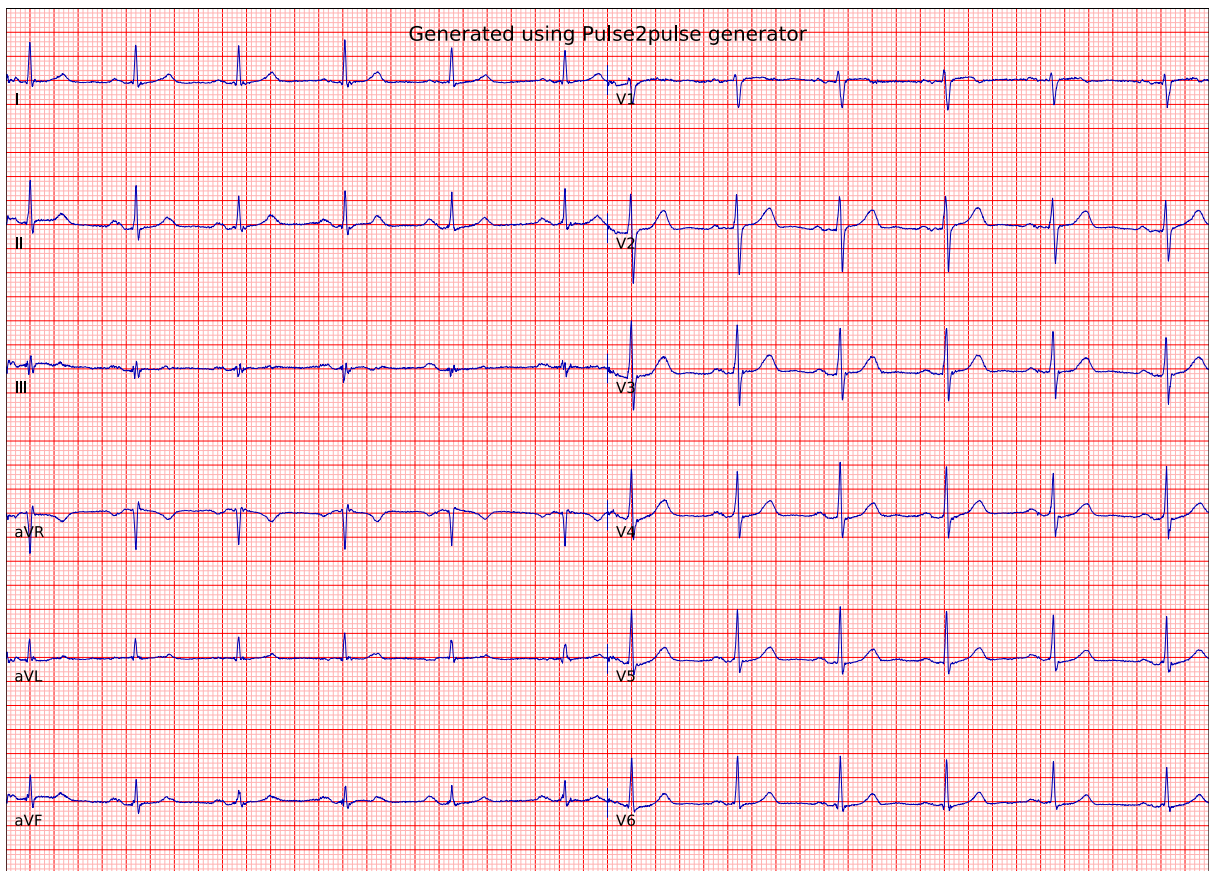

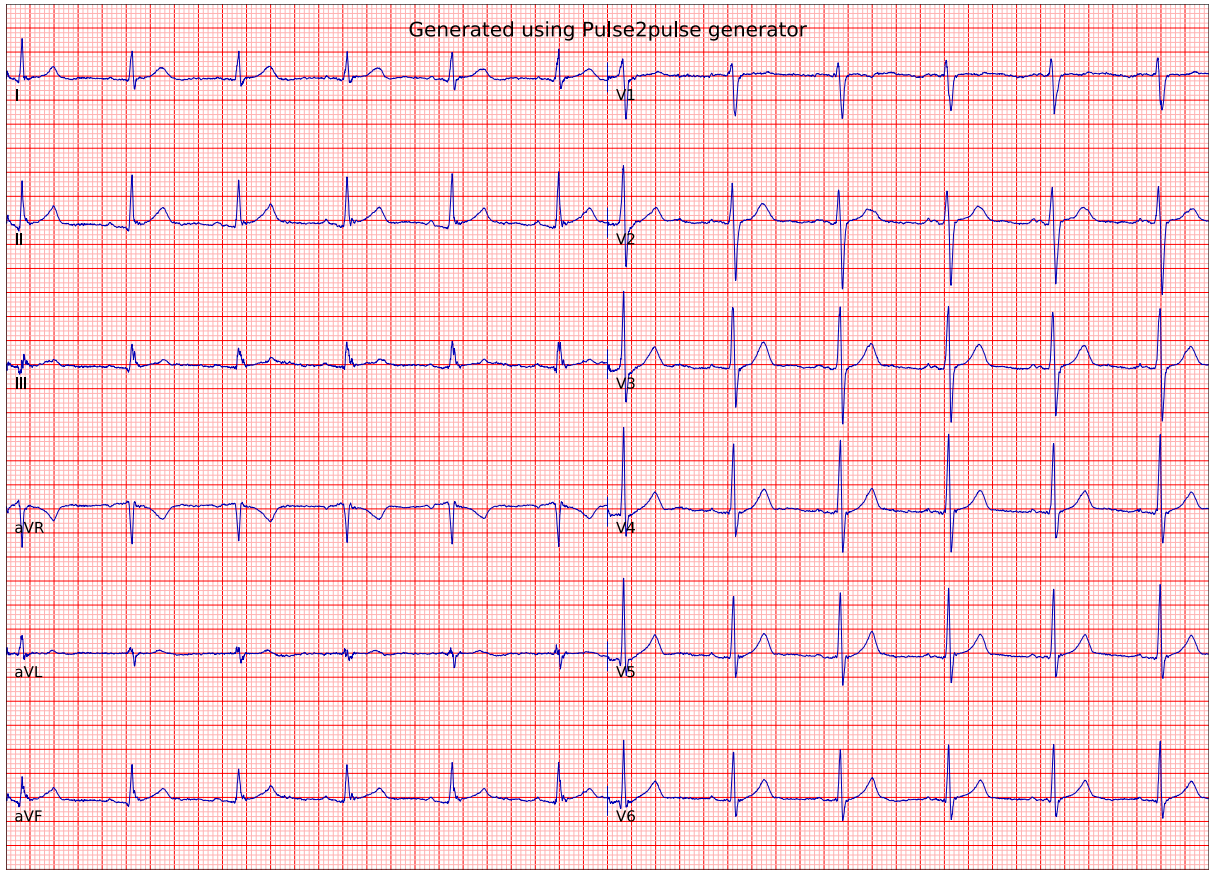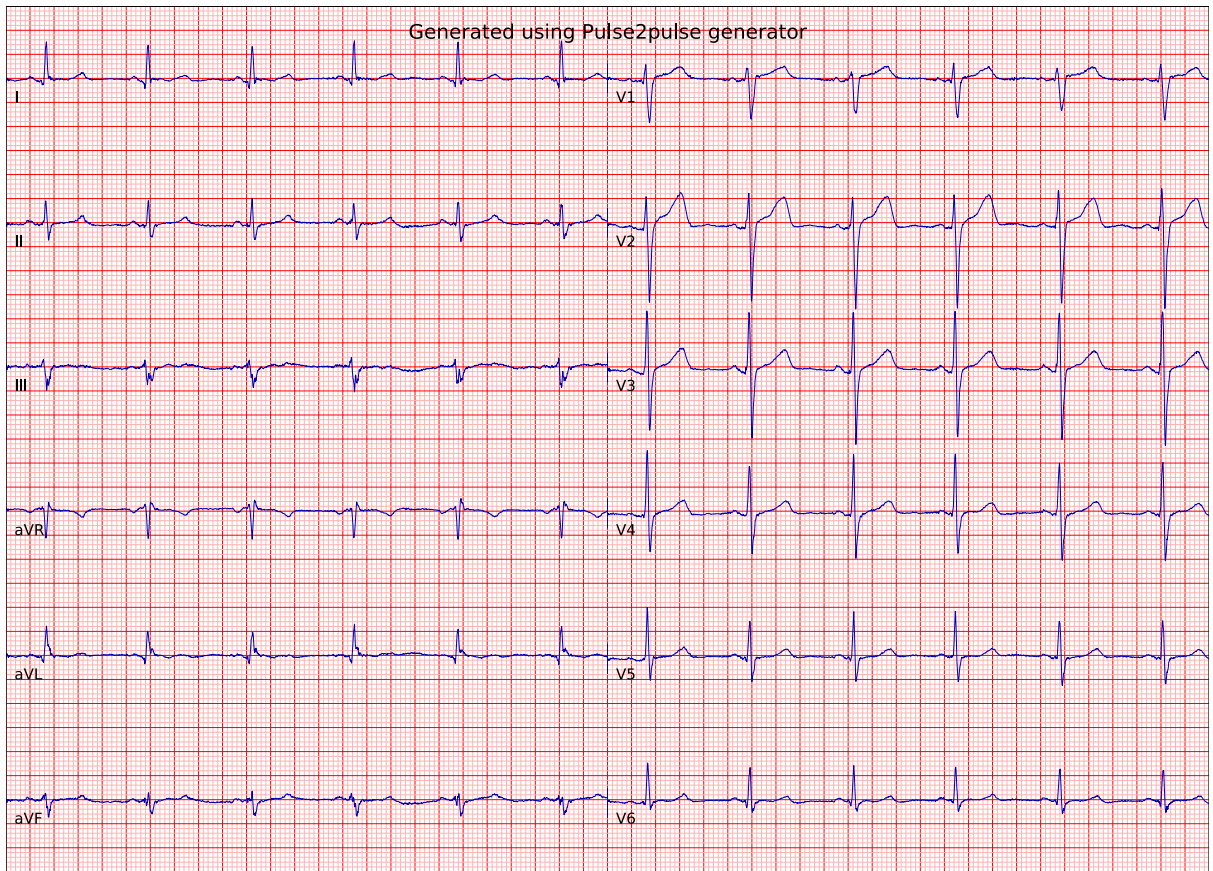



**Figure S1.** Twenty randomly selected DeepFake ECGs. All the ECGs were selected from the Normal DeepFake ECGs.

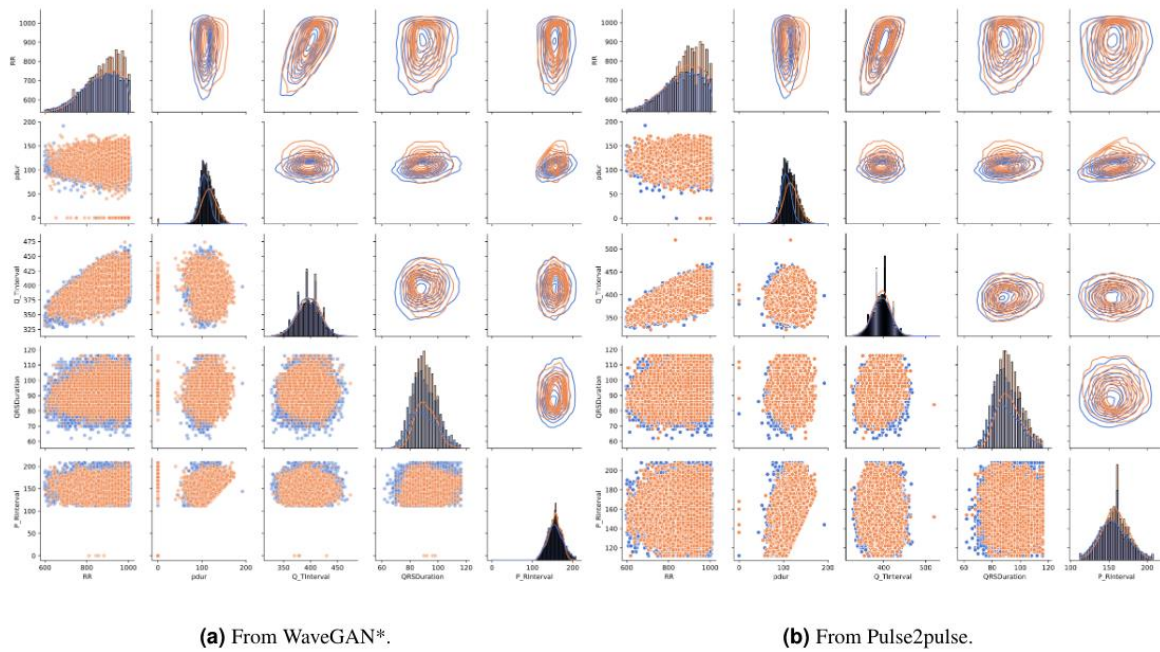

**Figure S2.** The comparisons of the real and DeepFake distributions. Blue color plots represent real normal ECG distributions. Orange color plots represent the distribution of fake ECGs generated by Wavenet\* (left lane (a)) and Pulse2pulse (Right Lane (b))
